# Supplementary material for: Latent bloodstain detection using a selective turn-on NIR fluorescence dye responsive to serum albumin
Source: Royal Society of Chemistry journal article supplement (doi:10.1039/d3ra04320g), 2023-01-01
Supplement: d3ra04320g1.pdf [file d3ra04320g1.pdf]

Supporting information

**Latent bloodstain detection using a selective turn-on NIR fluorescence dye responsive to serum albumin**

*Jing Qu,<sup>a</sup> William Meador,<sup>b</sup> Pohlee Cheah,<sup>a</sup> Eden E. L. Tanner,<sup>b</sup> Jared Delcamp,<sup>b,\*</sup> and Yongfeng Zhao<sup>a,\*</sup>*

<sup>a</sup> Department of Chemistry, Physics & Atmospheric Sciences, Jackson State University, Jackson, MS 39217, USA

<sup>b</sup> Department of Chemistry and Biochemistry, University of Mississippi, University, MS, 38677, USA

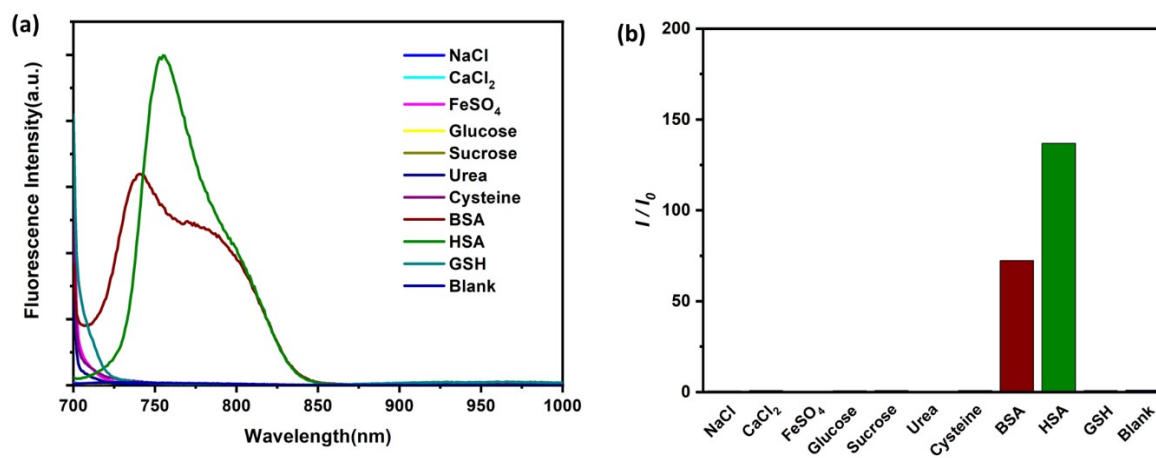

**Figure S1.** Fluorescence of body fluids with SO<sub>3</sub>SQ after 18 days at 693 nm excitation wavelength.

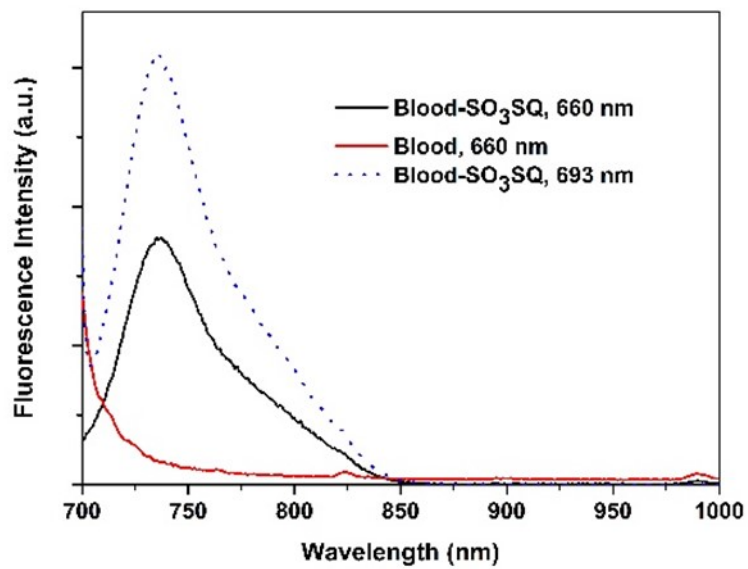

Figure S2. Fluorescent intensity of cattle blood (5.0  $\mu\text{L}/\text{mL}$ ) and blood-SO<sub>3</sub>SQ at excitation wavelength of 660 nm and 693 nm.

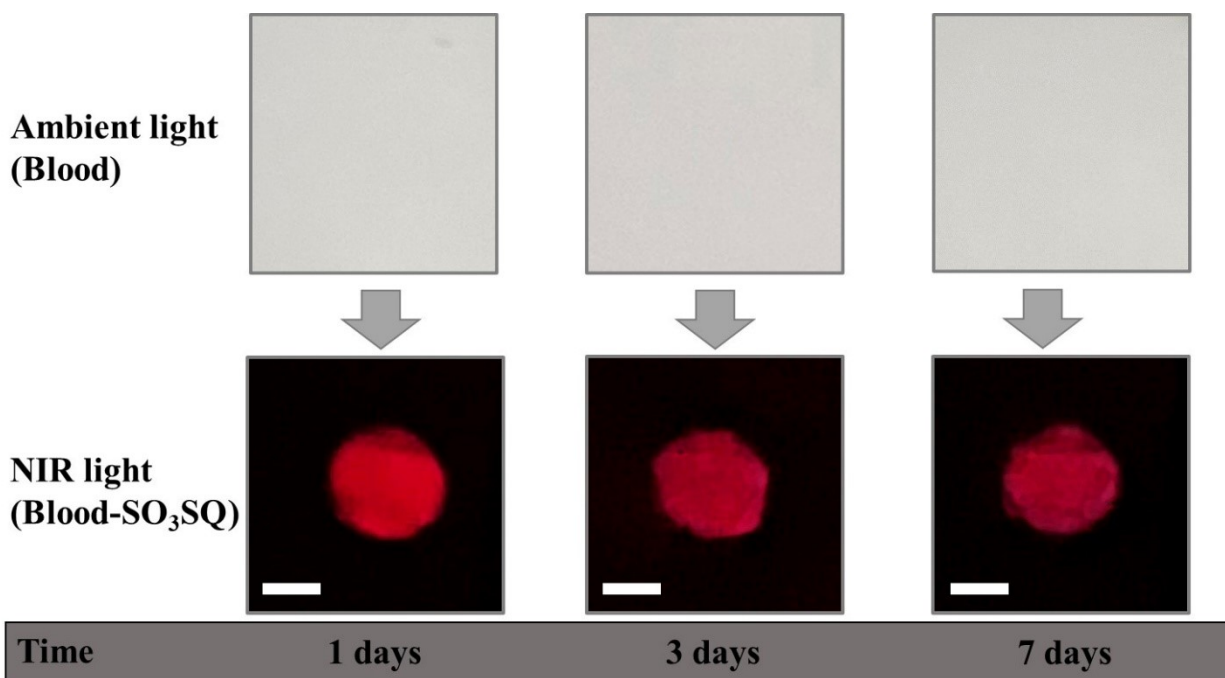

**Figure S3.** The visualization of aged bloodstain. The photographs were taken under ambient light and under NIR light after bloodstain was aged for 1, 3, and 7 days, respectively. The concentration of SO<sub>3</sub>SQ is 0.075 mg/mL. The scale bar: 8 mm.

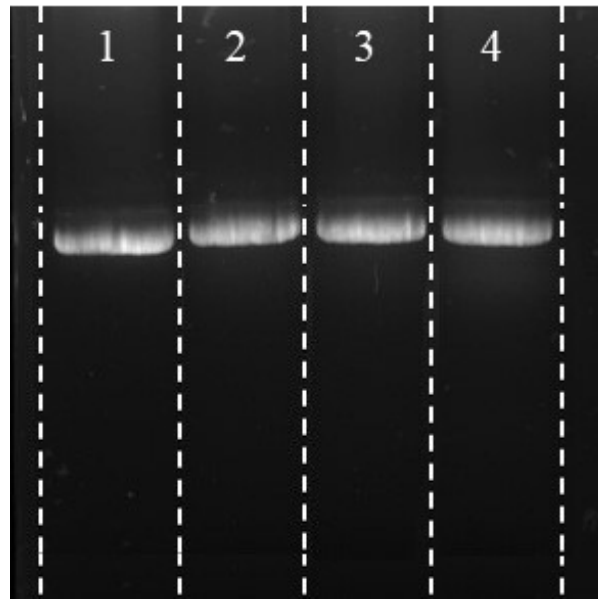

**Figure S4.** Agarose gel electrophoresis of DNA. Lane 1: no treatment (control); Lane 2: treated with 0.1 mM SO<sub>3</sub>SQ; Lane 3: treated with 0.5 mM SO<sub>3</sub>SQ; Lane 4: treated with 1.0 mM SO<sub>3</sub>SQ.

**Table S1.** The details of the illuminating and detecting optics

|                                                            |                         |
|------------------------------------------------------------|-------------------------|
| The exciting light flux                                    | 26.8 mW/cm <sup>2</sup> |
| The numerical aperture used for excitation                 | 20 cm                   |
| Focal length of the lens used for excitation               | 300 mm                  |
| The resolution of the camera (pixel-size)                  | 20 million              |
| The exposure type                                          | manual /automatic       |
| The working distance of the camera for the optimal imaging | 70 cm                   |

**Table S2.** The list for applicable light sources

| Item                                                                             | Brand    | model        |
|----------------------------------------------------------------------------------|----------|--------------|
| Predator UV/Red/Green Light Blacklight Flashlight Blood Tracking Hunting Torch   | VASTFIRE | LTB96        |
| Nicron B70 LED Twist Rechargeable Flashlight                                     | NICRON   | B70          |
| Cosmoing 400 Yards Tactical Red Gun Light Rechargeable LED Flashlight 18650      | Cosmoing | FL15-<br>RD  |
| Hunting Red Green Gun Light USB Rechargeable LED Tactical Flashlight Torch 18650 | Bruggex  | 1102         |
| Mini Powerful Red Light LED Flashlight Zoomable 3Modes Torch Night Vision Lamp   | AMSUER   | Red<br>Light |

**Table S3.** The list for applicable cameras

| Item                                    | Producing countries | Serial Number                                   |
|-----------------------------------------|---------------------|-------------------------------------------------|
| Sony ZV-E10 Camera                      | Digital SLR         | Sony ZV-E10 Mirrorless Camera with 16-50mm Lens |
| Canon EOS 2000D Rebel T7 DSLR Camera    | Digital SLR         | Canon EOS 2000D                                 |
| NBD Digital Camera                      | Compact             | ND                                              |
| KODAK PIXPRO AZ421 Red Digital Camera   | Digital SLR         | AZ421                                           |
| Nikon COOLPIX P1000 16MP Digital Camera | Point & Shoot       | Nikon Coolpix P1000                             |
